# Supplementary figures and images for: Assessing the Efficacy of Bortezomib and Dexamethasone for Induction and Maintenance Therapy in Relapsed/Refractory Cutaneous T-Cell Lymphoma: A Phase II CISL1701/BIC Study
Source: PubMed Central journal article supplement — Cancer Res Treat. 2024 Jul 16;57(1):267–79. doi: 10.4143/crt.2024.479 (PMC11729325; doi:10.4143/crt.2024.479), 2024-07-16

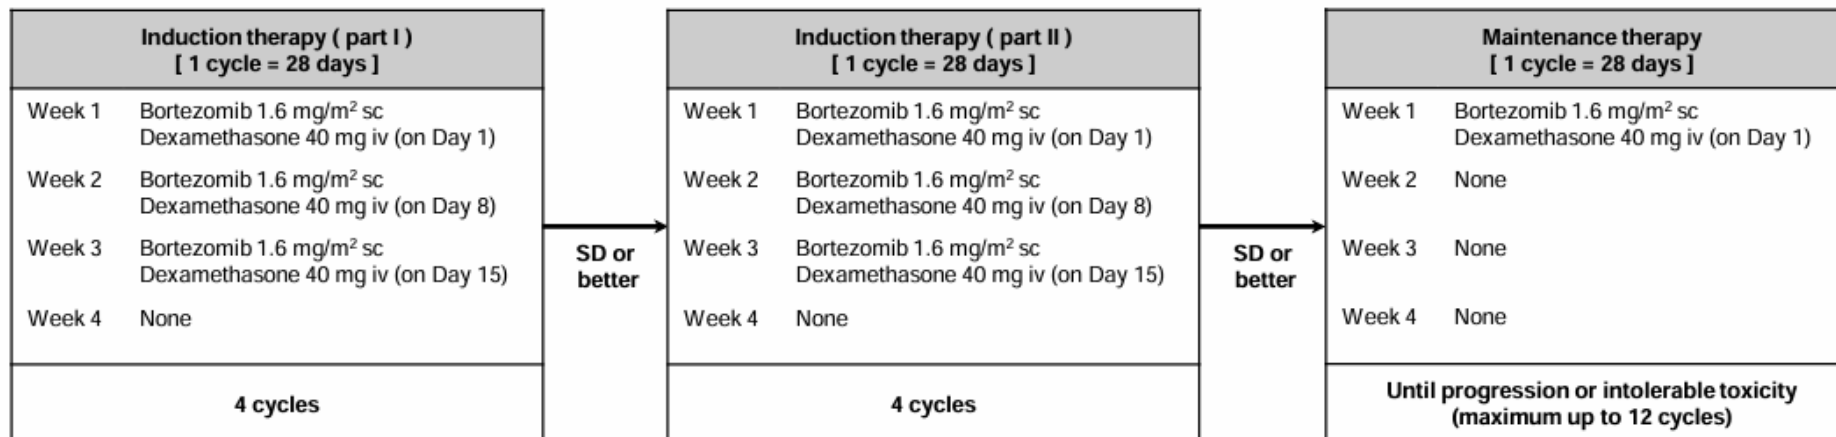

**S1 Fig.** Schema of study treatment. iv, intravenous; sc, subcutaneous.

Supplement: crt-2024-479_S1_Fig.pdf [file crt-2024-479_S1_Fig.pdf]
